# Supplementary material
Source: publisher figshare collection journal article supplement (https://tandf.figshare.com/ndownloader/files/22080633)
Supplement: Supplementary file 1 [file 22080633]

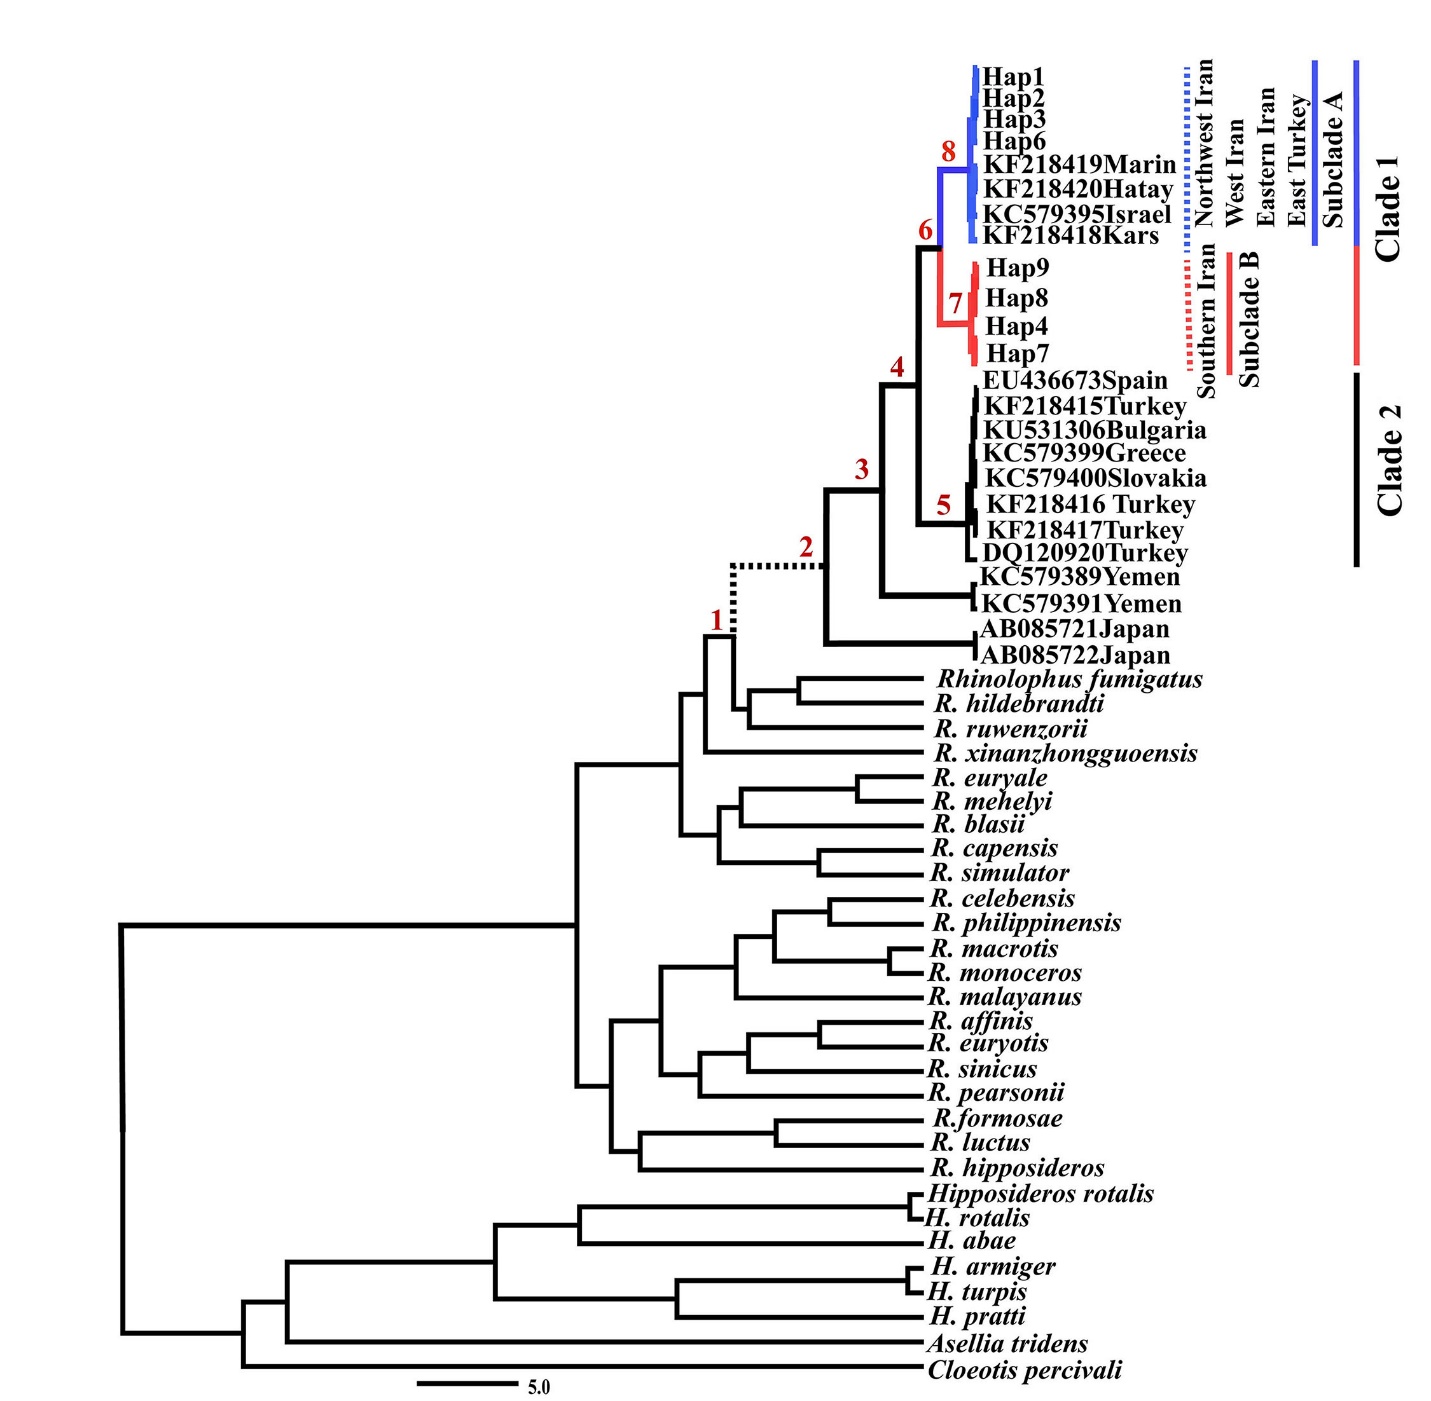


Supplementary Figure 1. Maximum clade credibility tree inferred in BEAST based on the Cytb data analysis of *ferrumequinum*/*clivosus* complex using external, rate and fossil calibrations. Numbers above the branches present the divergence times for nodes in million years with 95% highest posterior as expressed in Table 2.
